# Supplementary material for: Archive for Research in Child Health (ARCH) and Baby Gut: Study Protocol for a Remote, Prospective, Longitudinal Pregnancy and Birth Cohort to Address Microbiota Development and Child Health
Source: MDPI journal article supplement (doi:10.3390/mps4030052), 2021-08-03
Supplement: s1 [file s1]

**Table S1.** Comparison of sociodemographic information and sample shipping time for ARCHBG participants who submitted all fecal samples versus those who missed at least one fecal sample.

|                                                    | Submitted All Infant and Maternal Samples | Missed Infant or Maternal Sample | Overall (ARCHBG) |
|----------------------------------------------------|-------------------------------------------|----------------------------------|------------------|
| <b>Infant</b>                                      |                                           |                                  |                  |
| N                                                  | 37                                        | 14                               | 51               |
| Female <sup>a</sup>                                | 11 (29.7)                                 | 5 (35.7)                         | 16 (31.4)        |
| <b>Mother</b>                                      |                                           |                                  |                  |
| N                                                  | 35                                        | 13                               | 48               |
| Race <sup>a</sup>                                  |                                           |                                  |                  |
| <i>White/Caucasian</i> <sup>a</sup>                | 28 (80.0)                                 | 10 (76.9)                        | 38 (79.2)        |
| <i>Black/African American</i> <sup>a</sup>         | 4 (11.4)                                  | 2 (15.4)                         | 6 (12.5)         |
| <i>Other</i> <sup>a</sup>                          | 3 (8.57)                                  | 1 (7.69)                         | 4 (8.33)         |
| Age at Birth (years) <sup>b</sup>                  | 31.0 ± 4.4 *                              | 31.1 ± 3.8                       | 31.2 ± 4.3 *     |
| College Degree <sup>a</sup>                        | 24 (70.6) *                               | 6 (46.2)                         | 30 (63.8) *      |
| Married <sup>a</sup>                               | 30 (85.7)                                 | 8 (61.5)                         | 38 (79.2)        |
| Household Income ≥ 50,000 USD <sup>a</sup>         | 14 (42.4) **                              | 12 (92.3)                        | 26 (56.5) **     |
| Own a Home <sup>a</sup>                            | 18 (51.4)                                 | 4 (30.8)                         | 22 (45.8)        |
| Own Stocks/Bond <sup>a</sup>                       | 19 (54.3)                                 | 4 (30.8)                         | 23 (47.9)        |
| Own a Car <sup>a</sup>                             | 35 (100)                                  | 11 (84.6)                        | 46 (95.8)        |
| <b>Sample Shipping Time (days)</b>                 |                                           |                                  |                  |
| Pregnancy (3 <sup>rd</sup> Trimester) <sup>c</sup> | 4 (0–11); 32                              | 3.5 (0–7); 10                    | 4 (0–11); 42     |
| One Week Infant <sup>c</sup>                       | 4 (0–14); 35                              | 4 (2–9); 9                       | 4 (0–14); 44     |
| Six Month Infant <sup>c</sup>                      | 4 (0–22); 34                              | 3 (1–12); 10                     | 4 (0–22); 44     |
| 12 Month Infant <sup>c</sup>                       | 4 (1–31); 36                              | 2 (2–9); 7                       | 4 (1–31); 43     |
| 24 Month Infant <sup>c</sup>                       | 4 (0–14); 35                              | 3.5 (1–8); 4                     | 4 (0–14); 39     |

\* Each asterisk indicates a missing data point. Therefore, if there are two asterisks, there are two missing data points.

<sup>a</sup> n (%)

<sup>b</sup> mean ± standard deviation

<sup>c</sup> median (range); n

No statistically significant differences.

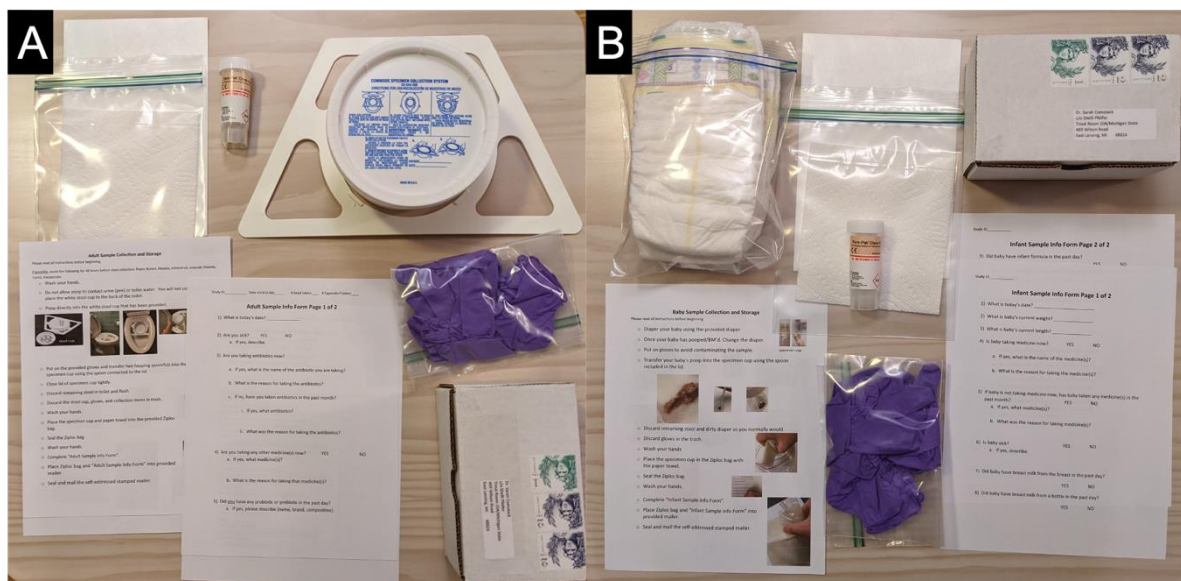

**Figure S1.** Photo of (a) maternal fecal sample collection kit and (b) infant fecal sample collection kit.
